# Supplementary material
Source: PubMed Central journal article supplement (PMC7579681)

# ***Supporting Information for Glycosaminoglycan Compositional Analysis of Relevant Tissues in ZIKV Pathogenesis and in vitro Evaluation of Heparin as Antiviral Against ZIKV Infection***

So Young Kim<sup>†</sup>, Cheri A Koetzner<sup>‡</sup>, Anne F. Payne<sup>‡</sup>, Gregory J. Nierode<sup>||</sup>, Yanlei Yu<sup>‡</sup>, Rufeng Wang<sup>||</sup>, Evan Barr<sup>¶</sup>, Jonathan S. Dordick<sup>†,||,¶,§</sup>, Laura D. Kramer<sup>‡,□</sup>, Fuming, Zhang<sup>||\*</sup>, Robert J. Linhardt<sup>†,||,‡,¶,§\*</sup>

<sup>†</sup>Biochemistry and Biophysics Graduate Program, Center for Biotechnology and Interdisciplinary Studies, Rensselaer Polytechnic Institute, Troy, NY 12180, USA, <sup>‡</sup>Wadsworth Center, New York State Department of Health, Slingerlands, NY, 12159, USA, <sup>||</sup>Department of Chemical and Biological Engineering, Center for Biotechnology and Interdisciplinary Studies, Rensselaer Polytechnic Institute, <sup>‡</sup>Department of Chemistry and Chemical Biology, Center for Biotechnology and Interdisciplinary Studies, Rensselaer Polytechnic Institute, <sup>¶</sup>Department of Biological Science, Center for Biotechnology and Interdisciplinary Studies, Rensselaer Polytechnic Institute <sup>§</sup>Department of Biomedical Engineering, Center for Biotechnology and Interdisciplinary Studies, Rensselaer Polytechnic Institute, <sup>□</sup>State University of New York at Albany School of Public Health, Albany, NY, 12222, USA.

## Supporting Information

**Figure S1.** Densitometric analysis of Western blot results in undifferentiated and 4-week differentiated ReNcell VM and CX for antibodies against A. nestin (NES), B. SOX2, C. glial fibrillary acidic protein (GFAP), D.  $\beta$ III-Tubulin (TUBB3), and E. CNPase (CNP) to confirm presence of NPC, astrocytes, neurons, and oligodendrocytes, respectively.

**Figure S2.** Western Blot membranes A. from ReNcell VM lysate probed for the noted markers and B. of the same membranes stripped and re-probed for beta-actin as a loading control. U = undifferentiated cells, D = 4-week differentiated cells, LAD = ladder.

**Figure S3.** Western Blot membranes A. from ReNcell CX lysate probed for the noted markers and B. of the same membranes stripped and re-probed for beta-actin as a loading control.

Figure S1

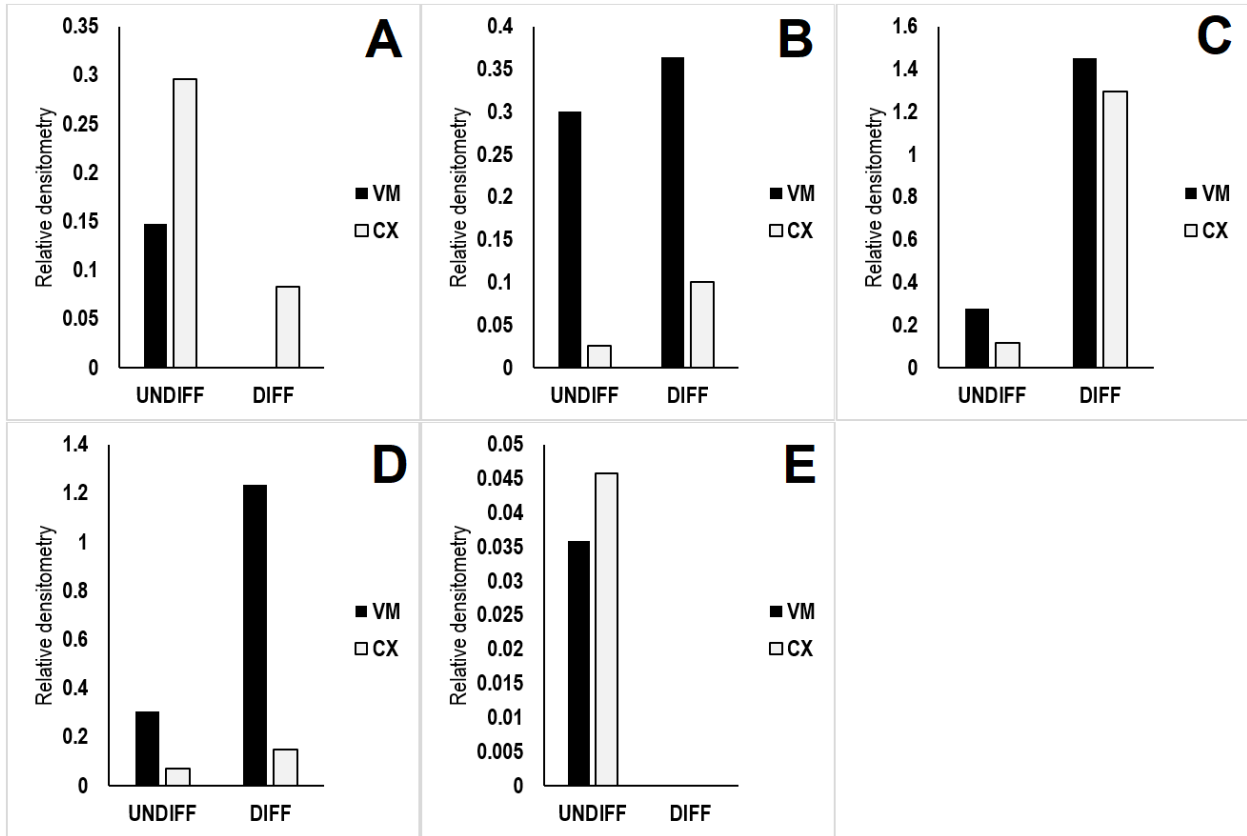

Figure S2

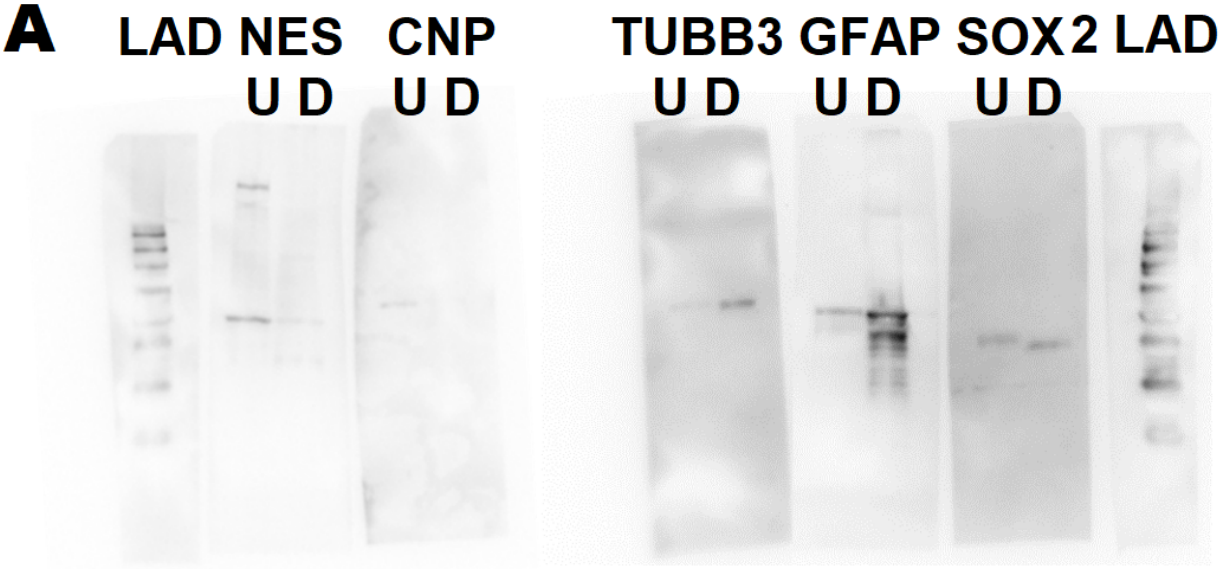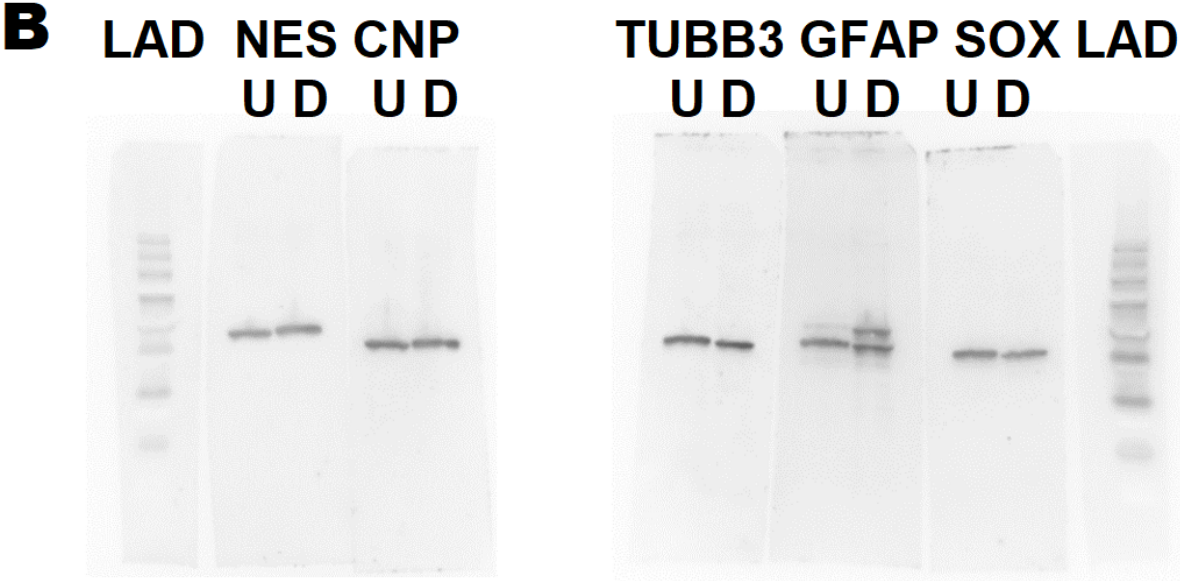

Figure S3

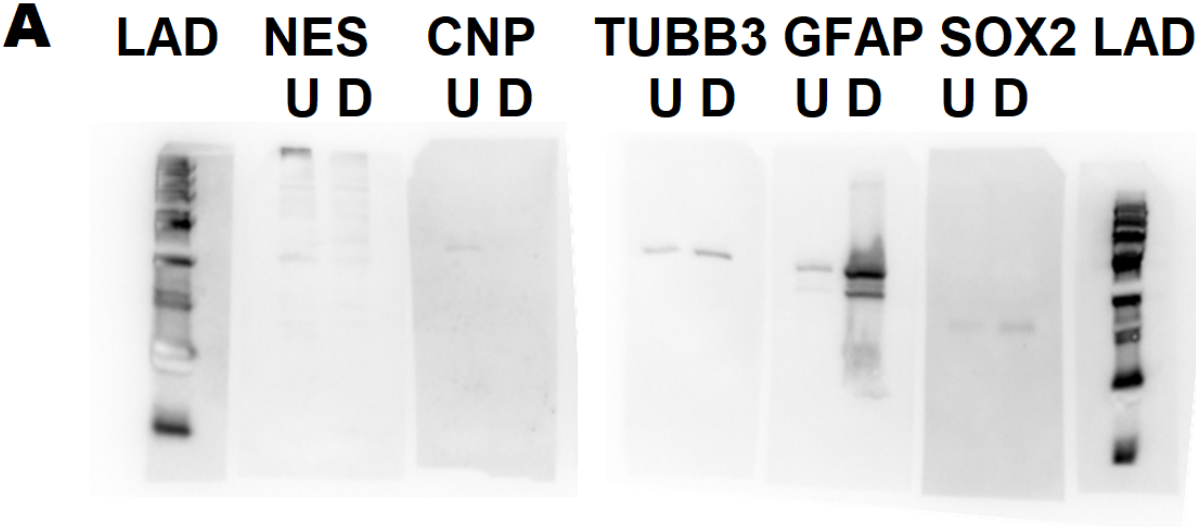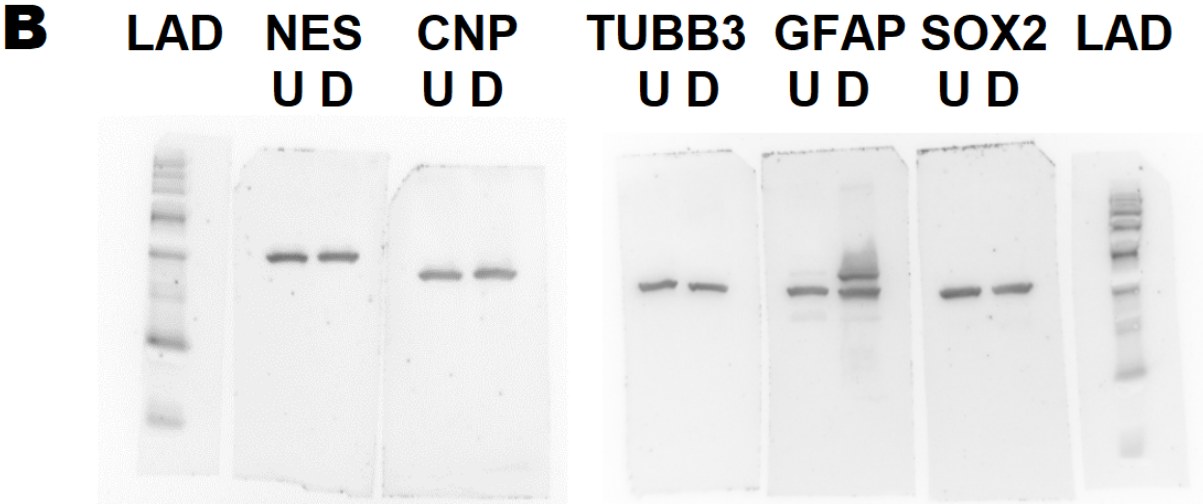

Supplement: NIHMS1635520-supplement-Zika_SI.pdf [file NIHMS1635520-supplement-Zika_SI.pdf]
